# Supplementary material for: Fusion of Ni Plating on CP-Titanium by Electron Beam Single-Track Scanning: Toward a New Approach for Fabricating TiNi Self-Healing Shape Memory Coating
Source: MDPI journal article supplement (doi:10.3390/ma16155449), 2023-08-03
Supplement: s1 [file s1]

## Supplementary

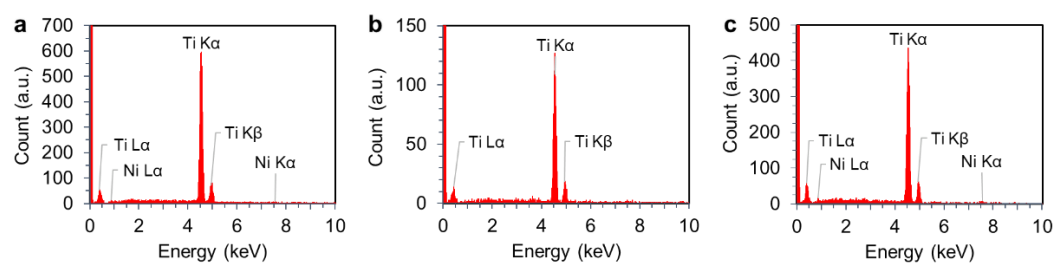

**Figure S1.** EDS spectra obtained at irregular pattern on the surface of melt track at  $P$  = (a) 400 W (area A in Figure 2), (b) 500 W (area B in Figure 2) and (c) 600 W (area C in Figure 2).
